# Supplementary material
Source: Springer Nature journal article supplement (https://www.springermedizin.de/resource/supplementary/12998_2012_62_MOESM4_ESM.pdf/9680080)

▲ Chiropractors ■ Primary Care Physicians

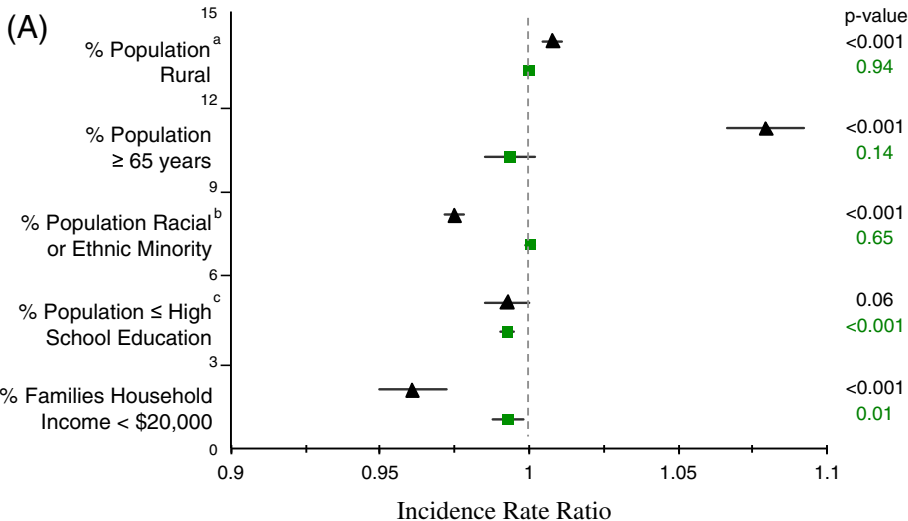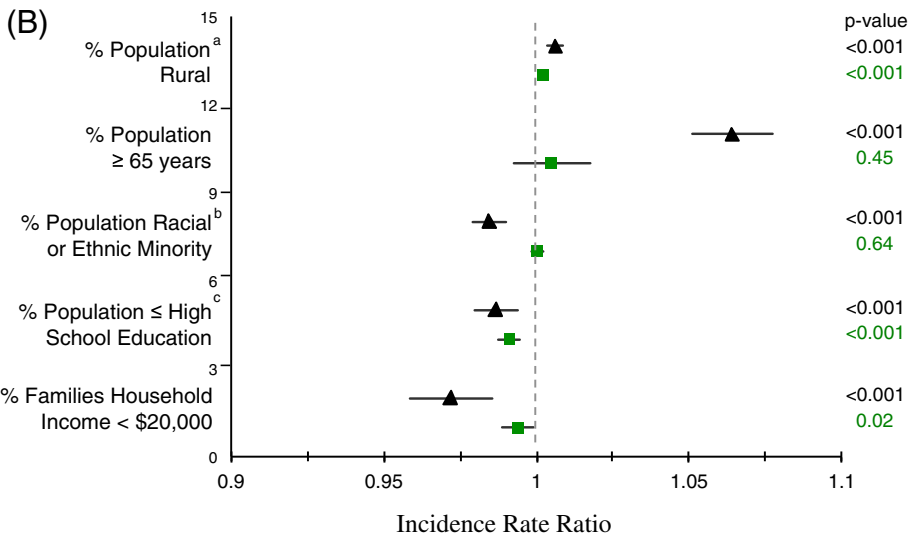

Supplement: MOESM4 [file 9680080]
